# Supplementary material for: Oral Manifestations of COVID-19: A Cross-Sectional Study of Their Prevalence and Association with Disease Severity
Source: MDPI journal article supplement (doi:10.3390/jcm11154461), 2022-07-30
Supplement: s1 [file s1]

**Supplementary Table S1.** Frequency, severity, and duration of oral manifestations of COVID-19.

| Symptoms                     |          | All participants<br>N=57<br>n/N | Mild COVID-19<br>disease<br>symptoms<br>11 (19) | Moderate<br>COVID-19<br>disease<br>symptoms<br>35 (62) | Severe & Critical<br>COVID-19 disease<br>symptoms <sup>π</sup><br>11 (19) | P value <sup>π π</sup> |
|------------------------------|----------|---------------------------------|-------------------------------------------------|--------------------------------------------------------|---------------------------------------------------------------------------|------------------------|
| <i>Distortion of taste</i> * |          |                                 |                                                 |                                                        |                                                                           |                        |
| Total                        |          | 34 (60)                         | 7 (21)                                          | 24 (70)                                                | 3 (9)                                                                     | 0.0658                 |
| Severity                     | Mild     | 5 (15)                          | 2 (40)                                          | 3 (60)                                                 | 0 (0)                                                                     | 0.5687                 |
|                              | Moderate | 11 (33)                         | 2 (18)                                          | 7 (64)                                                 | 2 (18)                                                                    |                        |
|                              | Severe   | <b>18 (53)</b>                  | 3 (17)                                          | 14 (78)                                                | 1 (5)                                                                     |                        |
| Duration                     | 1-2 days | 0 (0)                           | 0 (0)                                           | 0 (0)                                                  | 0 (0)                                                                     | 0.7873                 |
|                              | 3-4 days | 6 (18)                          | 2 (33)                                          | 4 (67)                                                 | 0 (0)                                                                     |                        |
|                              | 5+ days  | <b>27 (82)</b>                  | 5 (19)                                          | 19 (70)                                                | 3 (11)                                                                    |                        |
| <i>Xerostomia</i> **         |          |                                 |                                                 |                                                        |                                                                           |                        |
| Total                        |          | 24 (42)                         | 5 (21)                                          | 12 (50)                                                | 7 (64)                                                                    | 0.2857                 |
| Severity                     | Mild     | 5 (21)                          | 2 (40)                                          | 3 (60)                                                 | 0 (0)                                                                     | 0.3919                 |
|                              | Moderate | <b>16 (67)</b>                  | 2 (12)                                          | 8 (50)                                                 | 6 (38)                                                                    |                        |
|                              | Severe   | 3 (12)                          | 1 (33)                                          | 1 (33)                                                 | 1 (33)                                                                    |                        |
| Duration                     | 1-2 days | 3 (13)                          | 0 (0)                                           | 3 (13)                                                 | 0 (0)                                                                     | 0.3453                 |
|                              | 3-4 days | 9 (39)                          | 1 (11)                                          | 4 (44)                                                 | 4 (44)                                                                    |                        |
|                              | 5+ days  | <b>11 (47)</b>                  | 4 (36)                                          | 4 (36)                                                 | 3 (37)                                                                    |                        |
| <i>Oral ulceration</i>       |          |                                 |                                                 |                                                        |                                                                           |                        |
| Total                        |          | 6 (11)                          | 0 (0)                                           | 4 (67)                                                 | 2 (33)                                                                    | 0.4104                 |
| Severity                     | Mild     | 1 (17)                          | 0 (0)                                           | 1 (100)                                                | 0 (0)                                                                     |                        |
|                              | Moderate | <b>4 (67)</b>                   | 0 (0)                                           | 3 (75)                                                 | 1 (25)                                                                    |                        |
|                              | Severe   | 1 (16)                          | 0 (0)                                           | 0 (0)                                                  | 1 (100)                                                                   |                        |
| Duration                     | 1-2 days | 0 (0)                           | 0 (0)                                           | 0 (0)                                                  | 0 (0)                                                                     | -                      |
|                              | 3-4 days | 2 (33)                          | 0 (0)                                           | 2 (100)                                                | 0 (0)                                                                     |                        |
|                              | 5+ days  | <b>4 (67)</b>                   | 0 (0)                                           | 2 (50)                                                 | 2 (50)                                                                    |                        |
| <i>Gingivitis</i> ***        |          |                                 |                                                 |                                                        |                                                                           |                        |
| Total                        |          | 3 (6)                           | 0 (0)                                           | 3 (100)                                                | 0 (0)                                                                     | -                      |
| Severity                     | Mild     | <b>3 (100)</b>                  | 0 (0)                                           | 3 (100)                                                | 0 (0)                                                                     | -                      |
|                              | Moderate | 0 (0)                           | 0 (0)                                           | 0 (0)                                                  | 0 (0)                                                                     |                        |
|                              | Severe   | 0 (0)                           | 0 (0)                                           | 0 (0)                                                  | 0 (0)                                                                     |                        |

|                                                     |          |                |        |         |         |        |
|-----------------------------------------------------|----------|----------------|--------|---------|---------|--------|
| Duration                                            | 1-2 days | 0 (0)          | 0 (0)  | 0 (0)   | 0 (0)   | -      |
|                                                     | 3-4 days | 0 (0)          | 0 (0)  | 0 (0)   | 0 (0)   |        |
|                                                     | 5+ days  | 0 (0)          | 0 (0)  | 0 (0)   | 0 (0)   |        |
| <i>Petechiae</i> <sup>+</sup>                       |          |                |        |         |         |        |
| Total                                               |          | 3 (6)          | 0 (0)  | 3 (100) | 0 (0)   | -      |
| Severity                                            | Mild     | <b>2 (67)</b>  | 0 (0)  | 2 (100) | 0 (0)   | -      |
|                                                     | Moderate | 1 (33)         | 0 (0)  | 1 (100) | 0 (0)   |        |
|                                                     | Severe   | 0 (0)          | 0 (0)  | 0 (0)   | 0 (0)   |        |
| Duration                                            | 1-2 days | 0 (0)          | 0 (0)  | 0 (0)   | 0 (0)   | -      |
|                                                     | 3-4 days | 0 (0)          | 0 (0)  | 0 (0)   | 0 (0)   |        |
|                                                     | 5+ days  | 1 (100)        | 0 (0)  | 1 (100) | 0 (0)   |        |
| <i>Candidiasis</i>                                  |          |                |        |         |         |        |
| Total                                               |          | 3 (6)          | 1 (33) | 1 (33)  | 1 (33)  | 0.3289 |
| Severity                                            | Mild     | <b>2 (67)</b>  | 1 (50) | 1 (50)  | 0 (0)   | 1.0000 |
|                                                     | Moderate | 0 (0)          | 0 (0)  | 0 (0)   | 0 (0)   |        |
|                                                     | Severe   | 1 (33)         | 0 (0)  | 0 (0)   | 1 (100) |        |
| Duration                                            | 1-2 days | <b>5 (83)</b>  | 3 (60) | 2 (40)  | 0 (0)   | 0.1667 |
|                                                     | 3-4 days | 0 (0)          | 0 (0)  | 0 (0)   | 0 (0)   |        |
|                                                     | 5+ days  | 1 (17)         | 0 (0)  | 0 (0)   | 1 (100) |        |
| <i>Necrotizing periodontal disease</i> <sup>y</sup> |          |                |        |         |         |        |
| Total                                               |          | 2 (4)          | 0 (0)  | 2 (100) | 0 (0)   | 1.0000 |
| Severity                                            | Mild     | <b>2 (100)</b> | 0 (0)  | 2 (100) | 0 (0)   | -      |
|                                                     | Moderate | 0 (0)          | 0 (0)  | 0 (0)   | 0 (0)   |        |
|                                                     | Severe   | 0 (0)          | 0 (0)  | 0 (0)   | 0 (0)   |        |
| Duration                                            | 1-2 days | 0 (0)          | 0 (0)  | 0 (0)   | 0 (0)   | -      |
|                                                     | 3-4 days | 0 (0)          | 0 (0)  | 0 (0)   | 0 (0)   |        |
|                                                     | 5+ days  | 0 (0)          | 0 (0)  | 0 (0)   | 0 (0)   |        |
| <i>Vesiculobullous lesions</i> <sup>z</sup>         |          |                |        |         |         |        |
| Total                                               |          | 2 (4)          | 0 (0)  | 2 (100) | 0 (0)   | 1.000  |
| Severity                                            | Mild     | <b>2 (100)</b> | 0 (0)  | 2 (100) | 0 (0)   | -      |
|                                                     | Moderate | 0 (0)          | 0 (0)  | 0 (0)   | 0 (0)   |        |
|                                                     | Severe   | 0 (0)          | 0 (0)  | 0 (0)   | 0 (0)   |        |
| Duration                                            | 1-2 days | 0 (0)          | 0 (0)  | 0 (0)   | 0 (0)   | -      |
|                                                     | 3-4 days | 0 (0)          | 0 (0)  | 0 (0)   | 0 (0)   |        |
|                                                     | 5+ days  | 0 (0)          | 0 (0)  | 0 (0)   | 0 (0)   |        |

|                                         |          |                |       |         |       |       |
|-----------------------------------------|----------|----------------|-------|---------|-------|-------|
| <i>Erythema migrans</i> <sup>±</sup>    |          |                |       |         |       |       |
| Total                                   |          | 2 (4)          | 0 (0) | 2 (100) | 0 (0) | 1.000 |
| Severity                                | Mild     | <b>2 (100)</b> | 0 (0) | 2 (100) | 0 (0) | -     |
|                                         | Moderate | 0 (0)          | 0 (0) | 0 (0)   | 0 (0) |       |
|                                         | Severe   | 0 (0)          | 0 (0) | 0 (0)   | 0 (0) |       |
| Duration                                | 1-2 days | 0 (0)          | 0 (0) | 0 (0)   | 0 (0) | -     |
|                                         | 3-4 days | 0 (0)          | 0 (0) | 0 (0)   | 0 (0) |       |
|                                         | 5+ days  | 0 (0)          | 0 (0) | 0 (0)   | 0 (0) |       |
| <i>Geographical tongue</i> <sup>β</sup> |          |                |       |         |       |       |
| Total                                   |          | 2 (4)          | 0 (0) | 2 (100) | 0 (0) | 1.000 |
| Severity                                | Mild     | <b>2 (100)</b> | 0 (0) | 2 (100) | 0 (0) | -     |
|                                         | Moderate | 0 (0)          | 0 (0) | 0 (0)   | 0 (0) |       |
|                                         | Severe   | 0 (0)          | 0 (0) | 0 (0)   | 0 (0) |       |
| Duration                                | 1-2 days | 0 (0)          | 0 (0) | 0 (0)   | 0 (0) | -     |
|                                         | 3-4 days | 0 (0)          | 0 (0) | 0 (0)   | 0 (0) |       |
|                                         | 5+ days  | 0 (0)          | 0 (0) | 0 (0)   | 0 (0) |       |

<sup>π</sup> 1 of those with severe and critical symptoms had critical symptoms of COVID-19 disease

<sup>ππ</sup> Chi square or fisher's test

\* 1 missing information on dysgeusia duration

\*\* 1 missing information on xerostomia duration

\*\*\* 3 missing information on gingivitis duration

•2 missing information on petechiae duration

<sup>γ</sup> information not collected on duration of necrotizing periodontal disease

<sup>±</sup> 2 missing information on vesicobullous disease duration

<sup>±±</sup> 2 missing information on Erythema migrans duration

<sup>β</sup> 2 missing information on geographical tongue duration
